# Supplementary material for: Planning Family Involvement in Early Childhood Programs.
Source: Oxford University Press journal article supplement (doi:10.1242/jcs.239384), 2000-01-01
Supplement: jcs239384supp.pdf [file jcs239384supp.pdf]

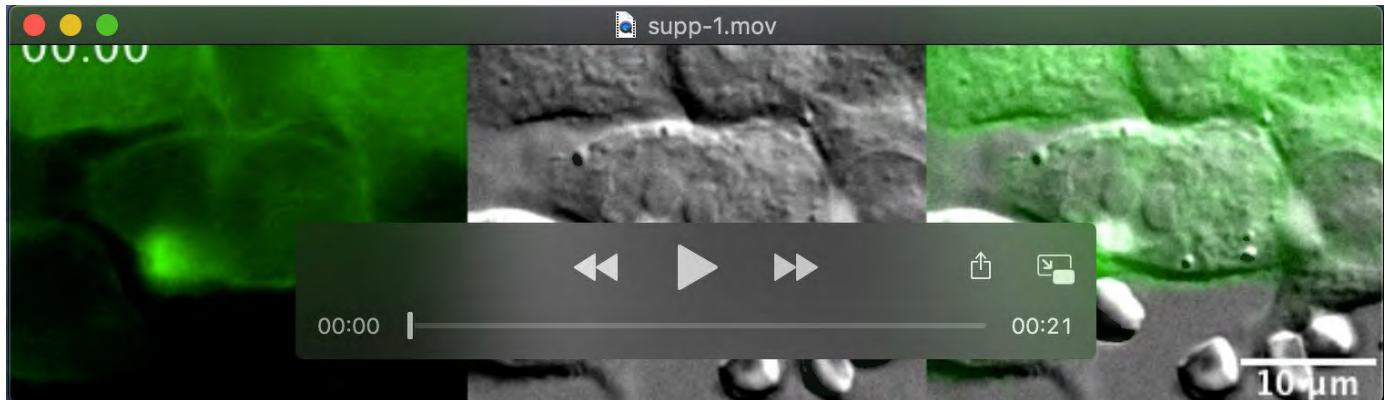

**Movie 1. F-actin flashes on CR-phagosomes in macrophages.** LifeAct-CFP (green) was transfected into RAW 264.7 cells and cells were exposed to C3bi-sRBCs. Fluorescent and DIC images were acquired every 15 seconds with time-lapse epifluorescence imaging for 1 hour. Arrow indicates a flashing phagosome and scale bar represents 10  $\mu\text{m}$ . The playback speed was 8 frames per second.

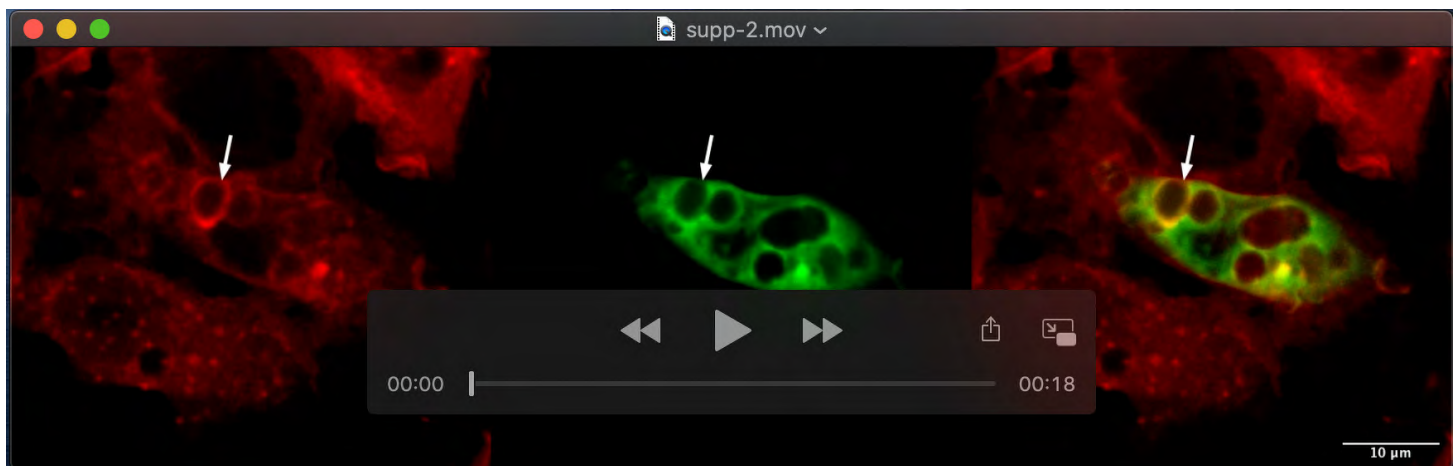

**Movie 2. mEmerald-talin recruitment to LifeAct-RFP-positive CR-phagosomes in macrophages.** mEmerald-talin (green) was co-transfected into RAW 264.7 cells stably expressing LifeAct-RFP (red) and exposed to C3bi-sRBCs. Fluorescent and DIC images were acquired every 45 seconds with spinning disk confocal imaging for 45 minutes. Time is shown in minutes starting from the beginning of imaging, approximately 15 minutes after particle internalization. Arrow indicates a flashing phagosome and scale bar represents 10  $\mu\text{m}$ . The playback speed was 3 frames per second.

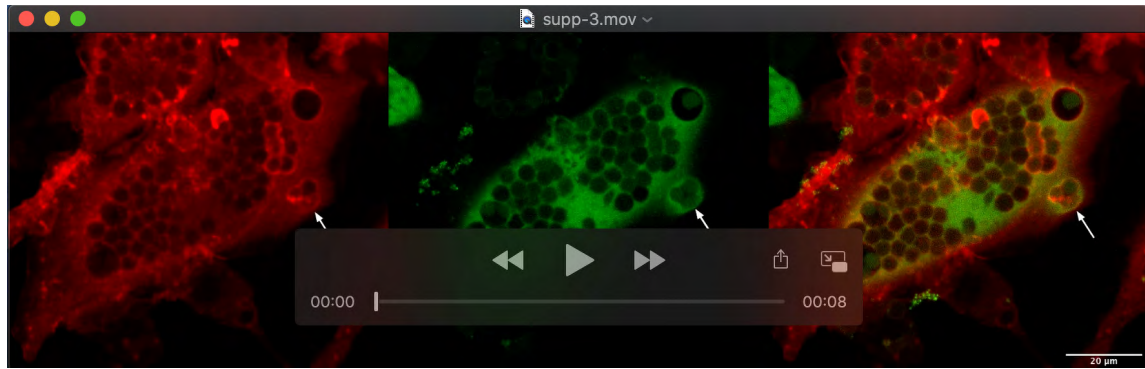

**Movie 3. GFP-rGBD recruitment to LifeAct-RFP-positive CR-phagosomes in macrophages.** GFP-rGBD (green) was co-transfected into RAW 264.7 cells stably expressing LifeAct-RFP (red) and exposed to C3bi-sRBCs. Fluorescent images were acquired every 45 seconds with spinning disk confocal imaging for 45 minutes. Time is shown in minutes starting from the beginning of imaging, approximately 15 minutes after particle internalization. Arrow indicates a flashing phagosome and scale bar represents 20  $\mu\text{m}$ . The playback speed was 3 frames per second.

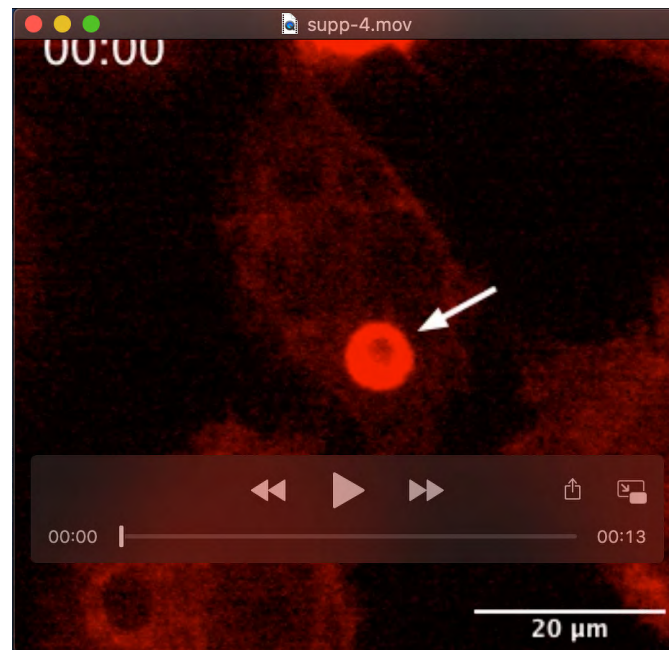

**Movie 4. F-actin flashes on CR-phagosomes in macrophages exposed to CK-666.** LifeAct-RFP expressing RAW 264.7 cells were exposed to C3bi-sRBCs for 15 minutes to ensure particle internalization prior to addition of 150  $\mu\text{M}$  CK-666. Fluorescent images were acquired every 40 seconds with spinning disk confocal imaging for 60 minutes. Time is shown in minutes starting from the beginning of imaging, approximately 15 minutes after particle internalization. Arrow indicates a flashing phagosome and scale bar represents 20  $\mu\text{m}$ . The playback speed was 3 frames per second.
